# Supplementary material for: Enhanced Expression of RAGE AXIS is Associated with Severity of COVID-19 in Patients with Comorbidities
Source: Research Square preprint supplement (doi:10.21203/rs.3.rs-1857771/v1), 2022-07-22

| **Table 1: Baseline characteristics of the population categorized on the basis of symptoms** | | |
| --- | --- | --- |
| COVID-19 Positive Patients Characteristics | Mild/Moderate Symptoms  n= 401 | Severe Symptoms  n=41 |
| Age, years Mean ± SD; | 42.95 ± 17.39 | 48.24 ± 20.47 |
| Men | 223 (50.4%) | 24 (5.4%) |
| Women | 178 (40.2%) | 17 (3.8%) |
| Number of patients with comorbidities 133 | 99 (22.3%) | 34 (7.6%) |
| Number of patients without comorbidities 309 | 289 (65.3%) | 20 (4.5) % |
| Hypertension | 58 | 24 |
| Diabetes | 54 | 30 |
| Both | 53 | 28 |
| Values are given either as mean for age or as *n* (% total) | | |

**Disease Sseverity Criteria:** The severity of the disease was determined according to the WHO/NIH classification (WHO. Coronavirus Disease 2019, Case Definitions. Available at: <https://www.who.int/docs/default-source/coronaviruse/situation-reports/20200321-sitrep-61-covid-19.pdf>.). Mild Illness: Individuals who have any of the various signs and symptoms of COVID-19 (e.g., fever, cough, sore throat, malaise, headache, muscle pain, nausea, vomiting, diarrhea, loss of taste and smell) but who do not have shortness of breath, dyspnea, or abnormal chest imaging. Moderate Illness: Individuals who show evidence of lower respiratory disease during clinical assessment or imaging and who have an oxygen saturation (SpO2) ≥94% on room air at sea level. Severe Illness: severe cases additionally met at least one of the following conditions: Individuals who have SpO2 <94% on room air at sea level, a ratio of arterial partial pressure of oxygen to fraction of inspired oxygen (PaO2/FiO2) <300 mm Hg, a respiratory rate >30 breaths/min, or lung infiltrates >50%.

**Table 2**

Primersused for real time qPCR

| Gene | Protein | Forward primer | Reverse Primer |
| --- | --- | --- | --- |
| *AGER* | RAGE | 5´-GGCAGACAGAGCCAGGAC-3’ | 5´-AGCACCCAGGCTCCAACT-3’ |
| RELA | NF-kB (p65 subunit) | 5’-ACTGTGTGACAAGGTGCAGAA-3’ | 5’-CACTTGTCGGTGCACATCA-3 |
| STAT3 | STAT3 | 5’-ACC AGC AGT ATA GCC GCT TC-3’ | 5’-GCC ACA ATC CGG GCA ATC T-3 |

Full images of Blots:


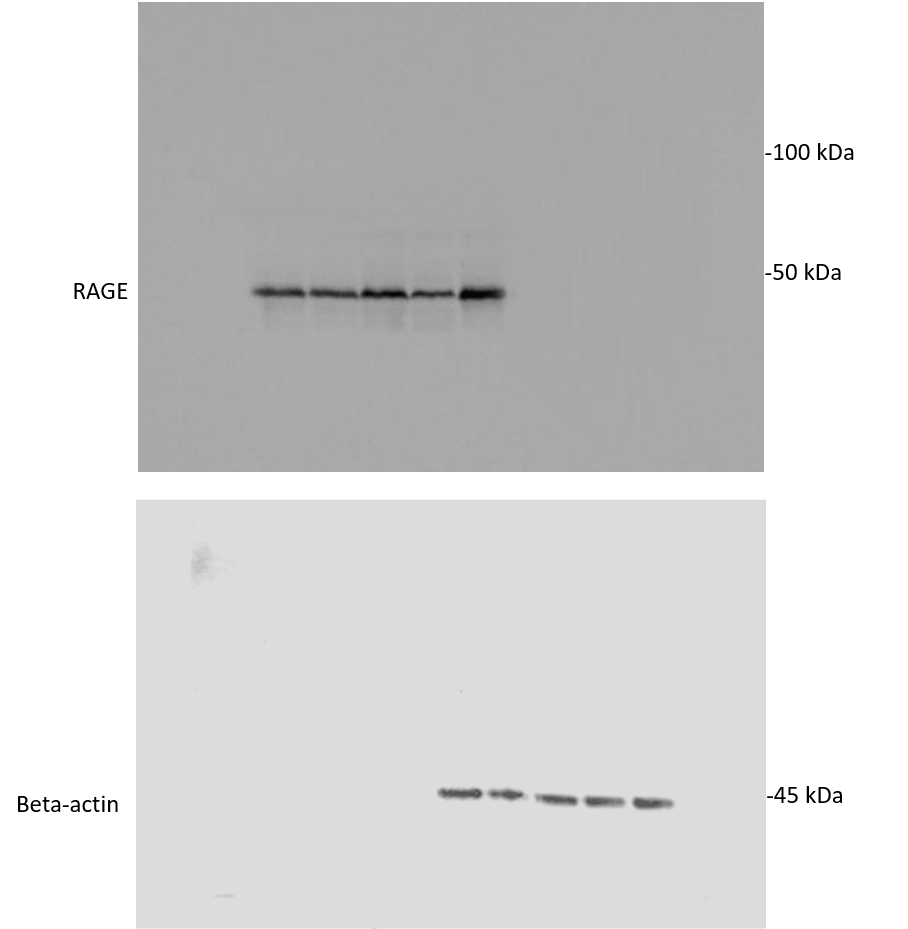

Supplement: Supplementary file 1 [file 01528ea867c07a7980310beb.docx]
